# Supplementary material for: Simulating the thermal regime and thaw processes of ice-rich permafrost ground with the land-surface model CryoGrid 3
Source: Copernicus journal article supplement (doi:10.5194/gmd-9-523-2016), 2016-02-08
Supplement: Supplementary file 1 [file gmd-9-523-2016-supplement.zip]

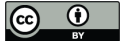

## *Supplement of*

# **Simulating the thermal regime and thaw processes of ice-rich permafrost ground with the land-surface model CryoGrid 3**

**S. Westermann et al.**

*Correspondence to:* S. Westermann ([sebastian.westermann@geo.uio.no](mailto:sebastian.westermann@geo.uio.no))

- [gmd-9-523-2016-supplement-title-page.pdf](#)
- [cryoGrid3\\_GMDD.m](#)
- modules
  - [cryoGridExcessIce](#)
    - \* [excessGroundIceThaw4.m](#)
    - \* [mixWaterLayer2.m](#)
    - \* [moveWater2Top.m](#)
    - \* [removeWater.m](#)
    - \* [setNewSurfaceParameters.m](#)
    - \* [updateGRID\\_excessice.m](#)
  - [cryoGridSEB](#)
    - \* [L\\_star.m](#)
    - \* [Q\\_e.m](#)
    - \* [Q\\_eq.m](#)
    - \* [Q\\_g.m](#)
    - \* [Q\\_h.m](#)
    - \* [psi\\_H.asv](#)
    - \* [psi\\_H.m](#)
    - \* [psi\\_M.m](#)
    - \* [satPresIce.m](#)
    - \* [satPresWater.m](#)
    - \* [surfaceCondition.m](#)
    - \* [surfaceEnergyBalance.m](#)
  - [cryoGridSnow](#)
    - \* [CryoGridSnow.m](#)
    - \* [cap\\_snow.m](#)

- \* cond\_snow.m
- \* infiltrateBottom2Top.asv
- \* infiltrateBottom2Top.m
- \* infiltrateTop2Bottom.m
- \* maxLiqWater.m
- \* melt.m
- \* refreeze.asv
- \* refreeze.m
- \* snowMelt.m
- \* updateGRID\_snow.m
- cryoGridSoil
  - \* conductivity2.m
  - \* createStratigraphy.m
  - \* getSoilThermalNew.m
  - \* heatConduction.m
  - \* initialize.m
  - \* readThermalParameters.m
- cryoGridTechnical
  - \* LayerIndex.m
  - \* convertRelative2absoluteHumidity.m
  - \* generateForcingAbsoluteHumidity.m
  - \* generateForcingRelativeHumidity.m
  - \* generateOUT.m
  - \* generateOUT.m
  - \* initialTemperature.m
  - \* initialTprofile.m
  - \* interpolateForcingData.m
  - \* smoothing.asv
  - \* smoothing.m
  - \* steadyState.m
  - \* v2struct.m
- samoylov\_forcing
  - samoylov\_ERA\_paper\_1979\_2014\_spinup.mat

The copyright of individual parts of the supplement might differ from the CC-BY 3.0 licence.
